# Supplementary material
Source: ML conference proceedings conference paper supplement (https://openaccess.thecvf.com/content/CVPR2023/html/Zhao_OmniAL_A_Unified_CVPR_2023_paper.html)
Supplement: Supplementary file 1 [file Zhao_OmniAL_A_Unified_CVPR_2023_supplemental.pdf]

## OmniAL: A unified CNN framework for unsupervised anomaly localization

### Supplementary Material

Ying Zhao

zy\_deepwhite\_zy@hotmail.com

Figure 7. Modules comparison. To make them have similar numbers of parameters with our DCSA module, we adjust the feature map dimensions for the resblock and bottleneck.

| Modules    | M-P            | Rec-P             | Loc-P             | I-AUC       | P-AUC       | P-AP        |
|------------|----------------|-------------------|-------------------|-------------|-------------|-------------|
| resblock   | <b>527,019</b> | <b>63,906,674</b> | <b>30,852,340</b> | 93.3        | 94.2        | 60.0        |
| bottleneck | 524,966        | 62,852,068        | 30,847,397        | 95.7        | 96.1        | 62.5        |
| CA         | 524,288        | 62,851,972        | 28,700,493        | 96.8        | 98.2        | 72.7        |
| DCSA       | 524,328        | 62,852,092        | 28,700,653        | <b>97.2</b> | <b>98.3</b> | <b>73.4</b> |

Figure 8. Ablation study on DiffNeck balance factor. Our method achieves the best performance with factor 0.1.

Figure 9. Robustness comparison with unified Draem [4] and JNLD [5] on adversarial samples. ( $\epsilon = 8target$ )

Table 7. Network for adversarial perturbations. PA:Panel anomaly synthesis, Rec:Reconstruction subnetwork, Seg:Segmentation subnetwork, BB:Basic Block, BN:Batch Norm, IN:Instance Norm, DC:Dilated Convolution, CA:Channel Attention, DSA:Dilated Spatial Attention, I:Image-level classification, P:Pixel-level localization on clean MVTecAD [1].

| PA | Rec-BB |    |    | DCSA |     | Seg-BB |    | DiffNeck | I-AUROC          | P-AUROC   | P-AP      |
|----|--------|----|----|------|-----|--------|----|----------|------------------|-----------|-----------|
| -  | BN     | IN | DC | CA   | DSA | BN     | DC | -        | Unified/Separate |           |           |
| -  | √      | -  | -  | √    | -   | √      | -  | -        | 86.7/98.8        | 86.4/98.4 | 44.2/75.0 |

tion degradation. To get suitable  $\delta$ , the prediction degradation should be maximized. Thus, the objective of adversarial attacks is defined as

$$\delta = \underset{\delta}{\operatorname{argmax}} D(f(A + \delta|\theta), Y)$$

$$\|\delta\|_p = \left( \sum_i \|\delta_i\|^p \right)^{\frac{1}{p}} \leq \epsilon \quad (2)$$

PGD [2] iteratively solves the maximization problem and get the perturbations  $\delta$ .

$$\omega^{t+1} = \delta^t + \alpha \operatorname{sgn}(\nabla_{\delta} D(f(A + \delta|\theta), Y)) \quad (3)$$

$$\delta^{t+1} = \operatorname{clip}_{[-\epsilon, \epsilon] \cap [-A, 1-A]}(\omega^{t+1}) \quad (4)$$

Where  $\alpha$  is the adversarial step size,  $\operatorname{sgn}$  is the sign function that extracts the sign of gradients for perturbation  $\nabla_{\delta}$ ,  $\epsilon$  indicates the maximum perturbation injected to each clean pixel. The clip operation also guarantees that the adversarial sample within  $[0,1]$ . The perturbation  $\delta$  is initialized with the uniform distribution  $\operatorname{Uniform}(-\epsilon, \epsilon)$ . For degradation measurement, we use the same objective functions as training, that is, MSE, SSIM, and focal loss. To fully evaluate the model robustness, we get the final perturbation for each adversarial sample after 5 iterations with  $\epsilon = \{1/255, 2/255, 4/255, 8/255\}$  respectively. We also evaluate the robustness to the targeted attack  $\epsilon = (8/255, \text{targeted})$  by maximizing the probability of the normal-anomaly reversed segmentation ground truth. Fig.9 shows the examples of existing methods performance on targeted attack samples. Examples of different levels of adversarial anomaly samples for 15 classes of MVTecAD are shown in Fig.10. Table 7-11 illustrate that our method is more robust on anomaly localization and reconstruction robustness comparing with unified Draem [4] and JNLD [5] against 5-level adversarial samples.

## References

- [1] Paul Bergmann, Michael Fauser, David Sattlegger, and Carsten Steger. Mvtec AD - A comprehensive real-world dataset for unsupervised anomaly detection. In *CVPR*, pages 9592–9600, 2019. Computer Vision Foundation / IEEE. 2, 3
- [2] Aleksander Madry, Aleksandar Makelov, Ludwig Schmidt, Dimitris Tsipras, and Adrian Vladu. Towards deep learning models resistant to adversarial attacks. In *ICLR, 2018*. Open-Review.net. 1, 2
- [3] Yi Yu, Wenhan Yang, Yap-Peng Tan, and Alex C Kot. Towards robust rain removal against adversarial attacks: A comprehensive benchmark analysis and beyond. In *CVPR*, pages 6013–6022, 2022. 1
- [4] Vitjan Zavrtanik, Matej Kristan, and Danijel Skocaj. Draem - A discriminatively trained reconstruction embedding for surface anomaly detection. In *ICCV*, pages 8310–8319, 2021. IEEE. 1, 2, 4, 5
- [5] Ying Zhao. Just noticeable learning for unsupervised anomaly localization and detection. In *ICME*, pages In Press, 2022. 1, 2, 4, 5

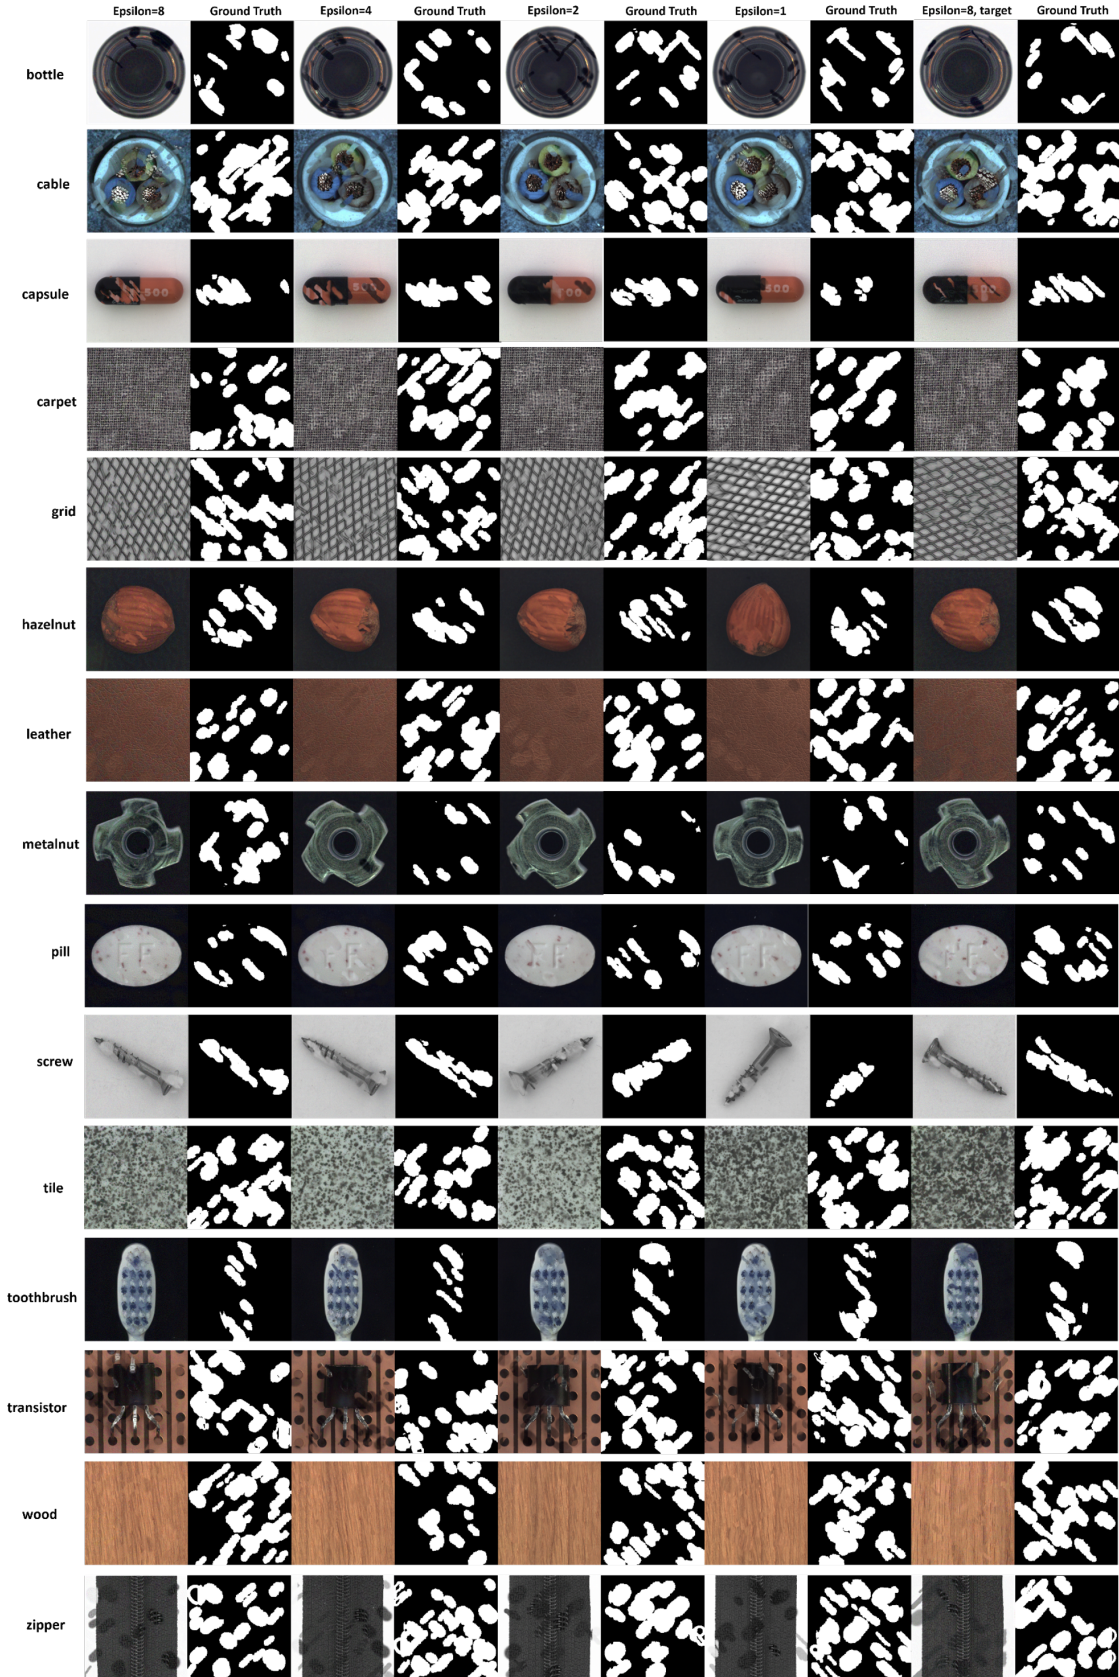

Figure 10. An overview of proposed 5-level adversarial samples( $\epsilon = 1, 2, 4, 8, 8target$ ) of 15 categories of MVTecAD [1].

Table 8. Anomaly localization(**Pixel-AP**) robustness comparison with unified Draem [4] and JNLD [5] on adversarial samples.

| Category   | Epsilon=8t                | Epsilon=8                 | Epsilon=4                 | Epsilon=2                        | Epsilon=1                 |
|------------|---------------------------|---------------------------|---------------------------|----------------------------------|---------------------------|
|            | Draem / JNLD / OmniAL     |                           |                           |                                  |                           |
| bottle     | 16.4 / <b>91.9</b> / 62.3 | 29.0 / <b>91.2</b> / 65.3 | 21.2 / <b>94.8</b> / 76.8 | 27.0 / <b>97.4</b> / 96.3        | 53.6 / 98.0 / <b>98.6</b> |
| cable      | 19.6 / 69.7 / <b>88.7</b> | 32.9 / 62.4 / <b>78.3</b> | 24.2 / 78.7 / <b>90.4</b> | 40.3 / 94.0 / <b>97.4</b>        | 55.0 / 95.8 / <b>98.5</b> |
| capsule    | 23.7 / 79.2 / <b>86.1</b> | 58.7 / 74.7 / <b>82.3</b> | 18.5 / 87.7 / <b>91.8</b> | 33.1 / 94.0 / <b>98.2</b>        | 33.8 / 96.8 / <b>98.6</b> |
| carpet     | 35.2 / 96.3 / <b>97.3</b> | 41.3 / 93.5 / <b>90.8</b> | 68.7 / <b>99.0</b> / 96.9 | 90.8 / <b>99.1</b> / <b>99.1</b> | 95.8 / 99.1 / <b>99.3</b> |
| grid       | 54.5 / 98.3 / <b>98.8</b> | 58.6 / 98.1 / <b>98.6</b> | 84.6 / <b>99.3</b> / 99.0 | 91.0 / 98.8 / <b>99.1</b>        | 91.6 / 98.9 / <b>99.1</b> |
| hazelnut   | 5.4 / 13.8 / <b>20.0</b>  | 5.5 / 14.9 / <b>18.2</b>  | 6.0 / 29.0 / <b>80.8</b>  | 7.8 / 67.9 / <b>96.4</b>         | 9.4 / 84.8 / <b>97.1</b>  |
| leather    | 15.6 / 22.8 / <b>74.1</b> | 14.9 / 17.8 / <b>40.4</b> | 16.9 / 65.2 / <b>91.6</b> | 20.8 / 94.7 / <b>97.9</b>        | 40.4 / 97.2 / <b>98.3</b> |
| metal nut  | 6.9 / 27.8 / <b>35.7</b>  | 7.2 / 24.2 / <b>28.1</b>  | 7.5 / 58.7 / <b>63.5</b>  | 9.4 / <b>92.7</b> / 91.1         | 14.9 / 96.0 / <b>97.4</b> |
| pill       | 6.7 / <b>24.1</b> / 12.3  | 6.1 / <b>19.8</b> / 11.0  | 7.1 / <b>53.2</b> / 40.6  | 7.8 / 89.4 / <b>93.5</b>         | 13.7 / 95.1 / <b>97.9</b> |
| screw      | 37.6 / 44.6 / <b>97.0</b> | 21.9 / 45.5 / <b>96.3</b> | 29.7 / 88.3 / <b>98.0</b> | 37.6 / 96.5 / <b>98.4</b>        | 37.6 / 97.6 / <b>98.6</b> |
| tile       | 20.4 / 24.1 / <b>42.8</b> | 19.4 / 19.0 / <b>20.7</b> | 24.9 / 31.0 / <b>39.7</b> | 34.7 / <b>86.5</b> / 81.8        | 44.7 / 97.2 / <b>97.8</b> |
| toothbrush | 6.2 / 69.0 / <b>89.6</b>  | 6.1 / 70.5 / <b>88.3</b>  | 9.7 / 85.8 / <b>95.1</b>  | 15.7 / 92.8 / <b>97.3</b>        | 33.3 / 93.5 / <b>98.0</b> |
| transistor | 27.7 / 84.6 / <b>96.0</b> | 22.0 / 76.6 / <b>92.5</b> | 28.0 / 92.0 / <b>97.4</b> | 36.2 / 97.7 / <b>98.7</b>        | 55.4 / 98.3 / <b>98.9</b> |
| wood       | 17.4 / 25.8 / <b>36.5</b> | 21.4 / 33.3 / <b>40.9</b> | 25.1 / 54.2 / <b>73.1</b> | 31.9 / 83.9 / <b>90.0</b>        | 36.3 / 91.2 / <b>94.1</b> |
| zipper     | 55.2 / 89.0 / <b>95.8</b> | 57.8 / 90.5 / <b>93.4</b> | 81.5 / 96.7 / <b>98.0</b> | 91.2 / 97.6 / <b>98.8</b>        | 92.6 / <b>98.6</b> / 99.0 |
| average    | 22.3 / 57.4 / <b>68.9</b> | 26.9 / 55.5 / <b>63.0</b> | 30.2 / 74.2 / <b>82.2</b> | 38.4 / 92.2 / <b>95.6</b>        | 47.2 / 95.9 / <b>98.1</b> |

Table 9. Anomaly detection(**Pixel-AUROC**) robustness comparison with unified Draem [4] and JNLD [5] on adversarial samples.

| Category   | Epsilon=8t                | Epsilon=8                 | Epsilon=4                 | Epsilon=2                 | Epsilon=1                 |
|------------|---------------------------|---------------------------|---------------------------|---------------------------|---------------------------|
|            | Draem / JNLD / OmniAL     |                           |                           |                           |                           |
| bottle     | 63.9 / <b>97.4</b> / 90.5 | 79.9 / <b>97.6</b> / 92.8 | 71.7 / <b>98.5</b> / 95.4 | 75.8 / 99.3 / <b>99.4</b> | 83.2 / 99.5 / <b>99.7</b> |
| cable      | 29.7 / 81.1 / <b>92.2</b> | 66.3 / 80.5 / <b>88.8</b> | 42.1 / 87.5 / <b>93.6</b> | 57.1 / 96.3 / <b>98.4</b> | 70.1 / 97.7 / <b>99.3</b> |
| capsule    | 74.2 / 89.6 / <b>97.9</b> | 89.4 / 89.2 / <b>97.6</b> | 72.2 / 96.0 / <b>98.8</b> | 76.5 / 98.6 / <b>99.7</b> | 75.5 / 99.4 / <b>99.9</b> |
| carpet     | 59.1 / 98.2 / <b>98.8</b> | 69.6 / <b>97.1</b> / 95.5 | 86.8 / <b>99.6</b> / 98.7 | 95.9 / 99.6 / <b>99.7</b> | 98.3 / 99.7 / <b>99.7</b> |
| grid       | 76.2 / 99.2 / <b>99.5</b> | 78.4 / 99.1 / <b>99.4</b> | 93.7 / <b>99.7</b> / 99.6 | 96.0 / 99.5 / <b>99.6</b> | 96.7 / 99.6 / <b>99.7</b> |
| hazelnut   | 10.4 / <b>63.3</b> / 63.0 | 11.2 / 67.1 / <b>61.6</b> | 19.8 / 75.8 / <b>96.0</b> | 36.2 / 89.4 / <b>99.3</b> | 38.8 / 96.3 / <b>99.5</b> |
| leather    | 19.4 / 47.2 / <b>85.1</b> | 13.2 / 31.6 / <b>61.3</b> | 22.1 / 79.4 / <b>95.0</b> | 40.3 / 97.6 / <b>99.2</b> | 64.3 / 98.9 / <b>99.4</b> |
| metal nut  | 16.5 / 72.8 / <b>78.0</b> | 22.3 / 65.0 / <b>70.5</b> | 25.1 / 87.8 / <b>91.6</b> | 34.7 / 98.1 / <b>98.3</b> | 56.4 / 99.0 / <b>99.5</b> |
| pill       | 19.8 / <b>72.7</b> / 58.6 | 20.0 / <b>67.8</b> / 48.0 | 27.8 / <b>83.4</b> / 77.9 | 36.8 / 97.6 / <b>98.7</b> | 61.1 / 99.1 / <b>99.7</b> |
| screw      | 74.2 / 73.8 / <b>99.6</b> | 73.3 / 73.3 / <b>99.5</b> | 77.6 / 96.9 / <b>99.8</b> | 79.7 / 99.5 / <b>99.8</b> | 78.5 / 99.7 / <b>99.8</b> |
| tile       | 36.6 / 47.2 / <b>65.6</b> | 32.1 / 31.0 / <b>38.1</b> | 45.2 / 54.7 / <b>67.1</b> | 58.9 / <b>93.5</b> / 91.7 | 65.8 / 98.7 / <b>99.0</b> |
| toothbrush | 24.0 / 93.1 / <b>98.1</b> | 19.0 / 93.3 / <b>97.8</b> | 47.2 / 96.3 / <b>99.3</b> | 64.5 / 98.8 / <b>99.6</b> | 83.9 / 99.1 / <b>99.8</b> |
| transistor | 45.0 / 90.6 / <b>98.0</b> | 39.2 / 86.0 / <b>96.2</b> | 51.1 / 95.6 / <b>98.7</b> | 63.5 / 99.0 / <b>99.5</b> | 76.6 / 99.3 / <b>99.6</b> |
| wood       | 28.5 / 45.0 / <b>53.8</b> | 40.4 / 55.4 / <b>59.1</b> | 45.4 / 72.1 / <b>82.5</b> | 52.9 / 91.6 / <b>94.9</b> | 55.0 / 95.4 / <b>97.0</b> |
| zipper     | 76.0 / 93.2 / <b>98.0</b> | 76.4 / 93.9 / <b>96.4</b> | 89.0 / 98.0 / <b>99.0</b> | 95.2 / 98.8 / <b>99.5</b> | 96.1 / 99.4 / <b>99.6</b> |
| average    | 43.6 / 77.6 / <b>85.1</b> | 48.7 / 75.2 / <b>80.2</b> | 54.5 / 88.1 / <b>92.9</b> | 64.3 / 97.1 / <b>98.5</b> | 73.4 / 98.7 / <b>99.4</b> |

Table 10. Anomaly reconstruction(PSNR) robustness comparison with unified Draem [4] and JNLD [5] on adversarial samples.

| Category   | Epsilon=8t                | Epsilon=8                 | Epsilon=4                 | Epsilon=2                 | Epsilon=1                 |
|------------|---------------------------|---------------------------|---------------------------|---------------------------|---------------------------|
|            | Draem / JNLD / OmniAL     |                           |                           |                           |                           |
| bottle     | 30.6 / 26.2 / <b>31.1</b> | 31.0 / 26.6 / <b>32.3</b> | 31.2 / 26.5 / <b>32.1</b> | 30.9 / 32.0 / <b>34.0</b> | 30.8 / 32.0 / <b>34.6</b> |
| cable      | 27.3 / 23.8 / <b>29.2</b> | 26.7 / 23.8 / <b>30.2</b> | 28.5 / 24.4 / <b>30.8</b> | 27.5 / 28.4 / <b>32.0</b> | 26.9 / 27.8 / <b>32.1</b> |
| capsule    | 28.0 / 24.6 / <b>29.6</b> | 28.4 / 25.0 / <b>31.3</b> | 30.0 / 25.4 / <b>31.8</b> | 29.6 / 30.4 / <b>33.2</b> | 29.4 / 30.1 / <b>33.6</b> |
| carpet     | 26.1 / 23.1 / <b>28.6</b> | 26.8 / 23.7 / <b>30.1</b> | 27.4 / 23.7 / <b>30.3</b> | 26.8 / 27.4 / <b>31.2</b> | 26.4 / 26.9 / <b>31.4</b> |
| grid       | 26.3 / 23.2 / <b>28.9</b> | 26.9 / 23.6 / <b>30.1</b> | 27.7 / 23.9 / <b>30.7</b> | 27.5 / 27.9 / <b>31.9</b> | 27.3 / 27.7 / <b>32.2</b> |
| hazelnut   | 27.3 / 24.3 / <b>29.4</b> | 27.5 / 24.4 / <b>30.3</b> | 28.8 / 25.5 / <b>31.5</b> | 28.8 / 29.4 / <b>32.9</b> | 28.9 / 29.4 / <b>33.3</b> |
| leather    | 27.4 / 24.9 / <b>29.6</b> | 27.5 / 24.8 / <b>30.3</b> | 28.9 / 26.0 / <b>31.6</b> | 28.9 / 29.5 / <b>33.0</b> | 29.0 / 29.5 / <b>33.5</b> |
| metal nut  | 27.5 / 25.0 / <b>29.5</b> | 27.5 / 24.9 / <b>30.0</b> | 28.9 / 26.1 / <b>31.5</b> | 28.9 / 29.5 / <b>32.9</b> | 29.0 / 29.5 / <b>33.4</b> |
| pill       | 27.8 / 25.4 / <b>29.6</b> | 27.8 / 25.3 / <b>30.0</b> | 29.5 / 26.7 / <b>31.8</b> | 29.8 / 30.3 / <b>33.5</b> | 30.1 / 30.6 / <b>34.1</b> |
| screw      | 28.1 / 25.6 / <b>29.9</b> | 27.9 / 25.3 / <b>30.2</b> | 29.7 / 26.8 / <b>32.1</b> | 30.1 / 30.7 / <b>33.9</b> | 30.4 / 31.0 / <b>34.5</b> |
| tile       | 27.7 / 25.3 / <b>29.8</b> | 27.6 / 25.1 / <b>30.0</b> | 29.2 / 26.5 / <b>31.8</b> | 29.5 / 30.1 / <b>33.5</b> | 30.0 / 30.5 / <b>34.2</b> |
| toothbrush | 27.7 / 25.3 / <b>29.8</b> | 27.6 / 25.1 / <b>29.9</b> | 29.2 / 26.5 / <b>31.8</b> | 29.5 / 30.1 / <b>33.5</b> | 29.9 / 30.4 / <b>34.2</b> |
| transistor | 27.7 / 25.3 / <b>29.8</b> | 27.8 / 25.1 / <b>29.9</b> | 29.3 / 26.4 / <b>31.8</b> | 29.6 / 30.1 / <b>33.5</b> | 29.9 / 30.5 / <b>34.2</b> |
| wood       | 27.8 / 25.4 / <b>29.8</b> | 27.7 / 25.3 / <b>29.9</b> | 29.2 / 26.5 / <b>31.9</b> | 29.5 / 30.0 / <b>33.5</b> | 29.9 / 30.4 / <b>34.2</b> |
| zipper     | 27.8 / 25.3 / <b>29.9</b> | 27.7 / 25.1 / <b>30.0</b> | 29.2 / 26.3 / <b>31.9</b> | 29.4 / 30.0 / <b>33.4</b> | 29.8 / 30.4 / <b>34.1</b> |
| average    | 27.7 / 24.8 / <b>29.6</b> | 27.8 / 24.9 / <b>30.3</b> | 29.1 / 25.8 / <b>31.6</b> | 29.1 / 29.7 / <b>33.1</b> | 29.2 / 29.8 / <b>33.6</b> |

Table 11. Anomaly reconstruction(SSIM) robustness comparison with unified Draem [4] and JNLD [5] on adversarial samples.

| Category   | Epsilon=8t                   | Epsilon=8                    | Epsilon=4                    | Epsilon=2                    | Epsilon=1                    |
|------------|------------------------------|------------------------------|------------------------------|------------------------------|------------------------------|
|            | Draem / JNLD / OmniAL        |                              |                              |                              |                              |
| bottle     | 0.921 / 0.879 / <b>0.932</b> | 0.940 / 0.893 / <b>0.953</b> | 0.940 / 0.900 / <b>0.952</b> | 0.956 / 0.959 / <b>0.971</b> | 0.961 / 0.965 / <b>0.977</b> |
| cable      | 0.875 / 0.823 / <b>0.921</b> | 0.890 / 0.833 / <b>0.947</b> | 0.911 / 0.856 / <b>0.950</b> | 0.910 / 0.920 / <b>0.967</b> | 0.906 / 0.918 / <b>0.972</b> |
| capsule    | 0.861 / 0.820 / <b>0.898</b> | 0.896 / 0.846 / <b>0.940</b> | 0.916 / 0.871 / <b>0.945</b> | 0.925 / 0.932 / <b>0.966</b> | 0.926 / 0.934 / <b>0.972</b> |
| carpet     | 0.841 / 0.782 / <b>0.907</b> | 0.872 / 0.810 / <b>0.937</b> | 0.879 / 0.821 / <b>0.944</b> | 0.876 / 0.887 / <b>0.960</b> | 0.872 / 0.884 / <b>0.964</b> |
| grid       | 0.860 / 0.798 / <b>0.916</b> | 0.878 / 0.815 / <b>0.939</b> | 0.896 / 0.833 / <b>0.951</b> | 0.897 / 0.905 / <b>0.965</b> | 0.896 / 0.905 / <b>0.970</b> |
| hazelnut   | 0.862 / 0.810 / <b>0.911</b> | 0.875 / 0.821 / <b>0.930</b> | 0.903 / 0.854 / <b>0.951</b> | 0.909 / 0.916 / <b>0.967</b> | 0.910 / 0.918 / <b>0.972</b> |
| leather    | 0.850 / 0.804 / <b>0.907</b> | 0.861 / 0.813 / <b>0.923</b> | 0.892 / 0.848 / <b>0.947</b> | 0.895 / 0.903 / <b>0.963</b> | 0.898 / 0.906 / <b>0.968</b> |
| metal nut  | 0.849 / 0.806 / <b>0.903</b> | 0.858 / 0.812 / <b>0.917</b> | 0.892 / 0.850 / <b>0.945</b> | 0.895 / 0.903 / <b>0.961</b> | 0.899 / 0.907 / <b>0.967</b> |
| pill       | 0.851 / 0.810 / <b>0.901</b> | 0.857 / 0.813 / <b>0.911</b> | 0.897 / 0.860 / <b>0.946</b> | 0.905 / 0.912 / <b>0.963</b> | 0.910 / 0.917 / <b>0.969</b> |
| screw      | 0.855 / 0.816 / <b>0.901</b> | 0.859 / 0.818 / <b>0.910</b> | 0.902 / 0.866 / <b>0.947</b> | 0.911 / 0.918 / <b>0.965</b> | 0.918 / 0.924 / <b>0.971</b> |
| tile       | 0.850 / 0.810 / <b>0.904</b> | 0.854 / 0.811 / <b>0.909</b> | 0.894 / 0.860 / <b>0.946</b> | 0.900 / 0.909 / <b>0.964</b> | 0.908 / 0.916 / <b>0.971</b> |
| toothbrush | 0.850 / 0.810 / <b>0.904</b> | 0.854 / 0.811 / <b>0.909</b> | 0.894 / 0.858 / <b>0.946</b> | 0.901 / 0.909 / <b>0.964</b> | 0.909 / 0.917 / <b>0.971</b> |
| transistor | 0.852 / 0.812 / <b>0.904</b> | 0.856 / 0.812 / <b>0.908</b> | 0.897 / 0.859 / <b>0.947</b> | 0.905 / 0.913 / <b>0.965</b> | 0.912 / 0.919 / <b>0.971</b> |
| wood       | 0.850 / 0.812 / <b>0.903</b> | 0.853 / 0.812 / <b>0.907</b> | 0.894 / 0.858 / <b>0.945</b> | 0.900 / 0.908 / <b>0.963</b> | 0.909 / 0.916 / <b>0.970</b> |
| zipper     | 0.850 / 0.808 / <b>0.903</b> | 0.853 / 0.808 / <b>0.907</b> | 0.893 / 0.853 / <b>0.945</b> | 0.897 / 0.908 / <b>0.962</b> | 0.905 / 0.916 / <b>0.969</b> |
| average    | 0.858 / 0.813 / <b>0.908</b> | 0.870 / 0.822 / <b>0.923</b> | 0.900 / 0.856 / <b>0.947</b> | 0.905 / 0.913 / <b>0.964</b> | 0.909 / 0.917 / <b>0.970</b> |
